# Supplementary material for: Impact of Oral Typhoid Vaccination on the Human Gut Microbiota and Correlations with S. Typhi-Specific Immunological Responses
Source: PLoS One. 2013 Apr 24;8(4):e62026. doi: 10.1371/journal.pone.0062026 (PMC3634757; doi:10.1371/journal.pone.0062026)
Supplement: Table S4 — Differentially abundant OTUs in multiphasic CMI responders and late responders. A q-value cutoff of q<0.05 was used. (DOCX) [file pone.0062026.s007.docx]

## Sheet: Sheet1
Table S4. Differentially abundant OTUs in multiphasic CMI responders and late responders. A q-value cutoff of q<0.05 was used.
OTU	mean(multiphasic)	variance(multiphasic)	std.err(multiphasic)	mean(late)	variance(late)	std.err(late)	p-value	q-value	# sequences in OTU	Phylum (% confidence)	Class (% confidence)	Order (% confidence)	Family (% confidence)	Genus (% confidence)	Species (% confidence)
Otu1883	0	0	0	0.000608317	4.99e-06	0.00054182	0.000999001	0.0290698	44	Actinobacteria(100)	Actinobacteria_(class)(100)	Actinomycetales(100)	Actinomycetaceae(100)	Actinomyces(100)	otu_279(89)
Otu1954	0.000115955	3.76e-07	0.000115955	0	0	0	0.000849479	0.0290698	19	Actinobacteria(100)	Actinobacteria_(class)(100)	Actinomycetales(100)	Microbacteriaceae(100)	Microbacterium(100)	Microbacterium_oleivorans(100)
Otu1875	0	0	0	0.000122057	6.59e-08	6.23e-05	0.0011923	0.0337193	31	Actinobacteria(100)	Actinobacteria_(class)(100)	Bifidobacteriales(100)	Bifidobacteriaceae(100)	Bifidobacterium(100)	unclassified
Otu1816	0.00157131	8.15e-06	0.000539388	6.52e-05	3.72e-08	4.68e-05	0.000999001	0.0290698	370	Actinobacteria(100)	Actinobacteria_(class)(100)	Coriobacteriales(100)	Coriobacteriaceae(100)	Adlercreutzia(100)	Adlercreutzia_equolifaciens(100)
Otu1819	0	0	0	0.00107951	1.42e-06	0.000289017	0.000999001	0.0290698	172	Actinobacteria(100)	Actinobacteria_(class)(100)	Coriobacteriales(100)	Coriobacteriaceae(100)	Adlercreutzia(100)	otu_916(100)
Otu1822	0	0	0	0.00037778	4.85e-07	0.000168941	0.000999001	0.0290698	23	Actinobacteria(100)	Actinobacteria_(class)(100)	Coriobacteriales(100)	Coriobacteriaceae(100)	Adlercreutzia(100)	otu_916(100)
Otu1821	0	0	0	0.000376676	6.04e-07	0.000188545	0.000999001	0.0290698	17	Actinobacteria(100)	Actinobacteria_(class)(100)	Coriobacteriales(100)	Coriobacteriaceae(100)	Adlercreutzia(95)	otu_916(95)
Otu1382	0	0	0	0.000201562	1.84e-07	0.000104149	4.36e-06	0.00167481	15	Actinobacteria(100)	Actinobacteria_(class)(100)	Coriobacteriales(100)	Coriobacteriaceae(100)	Collinsella(100)	Collinsella_aerofaciens(100)
Otu1377	0.00895509	0.000180042	0.00253576	0.0924817	0.00873343	0.0226656	0.000999001	0.0290698	14967	Actinobacteria(100)	Actinobacteria_(class)(100)	Coriobacteriales(100)	Coriobacteriaceae(100)	Collinsella(100)	Collinsella_aerofaciens(100)
Otu1379	0	0	0	0.00539048	0.000322306	0.00435421	0.000999001	0.0290698	147	Actinobacteria(100)	Actinobacteria_(class)(100)	Coriobacteriales(100)	Coriobacteriaceae(100)	Collinsella(100)	otu_922(100)
Otu1915	0	0	0	0.000945943	2.27e-06	0.000365466	0.000999001	0.0290698	52	Actinobacteria(100)	Actinobacteria_(class)(100)	Coriobacteriales(100)	Coriobacteriaceae(100)	otu_915(100)	unclassified(100)
Otu1857	0	0	0	0.000266878	2.22e-07	0.000114291	4.63e-07	0.000271496	113	Actinobacteria(100)	Actinobacteria_(class)(100)	Coriobacteriales(100)	Coriobacteriaceae(100)	Slackia(100)	otu_932(100)
Otu1922	0.00236683	6.92e-06	0.000497033	9.83e-05	1.22e-07	8.47e-05	0.000999001	0.0290698	390	Actinobacteria(100)	Actinobacteria_(class)(100)	Coriobacteriales(100)	otu_914(100)	unclassified(100)	unclassified(100)
Otu619	0.0169615	0.00134835	0.00693941	0	0	0	0.000999001	0.0290698	1748	Bacteroidetes(100)	Bacteroidia(100)	Bacteroidales(100)	Bacteroidaceae(100)	Bacteroides(100)	Bacteroides_coprocola(100)
Otu598	0.00029606	5.92e-07	0.000145423	1.98e-05	6.68e-09	1.98e-05	0.0016261	0.0445559	217	Bacteroidetes(100)	Bacteroidia(100)	Bacteroidales(100)	Bacteroidaceae(100)	Bacteroides(100)	Bacteroides_dorei(85)
Otu680	0	0	0	0.000645984	6.35e-07	0.000193267	0.000999001	0.0290698	37	Bacteroidetes(100)	Bacteroidia(100)	Bacteroidales(100)	Bacteroidaceae(100)	Bacteroides(100)	Bacteroides_finegoldii(100)
Otu693	0	0	0	0.000209138	7.44e-07	0.000209138	4.9e-08	8.63e-05	31	Bacteroidetes(100)	Bacteroidia(100)	Bacteroidales(100)	Bacteroidaceae(100)	Bacteroides(100)	Bacteroides_fragilis(100)
Otu637	0	0	0	0.000110502	4.68e-08	5.25e-05	0.000388237	0.0290698	39	Bacteroidetes(100)	Bacteroidia(100)	Bacteroidales(100)	Bacteroidaceae(100)	Bacteroides(100)	Bacteroides_massiliensis(100)
Otu567	2.55e-05	6.96e-09	1.58e-05	0.00123116	1.88e-06	0.000332793	0.000999001	0.0290698	459	Bacteroidetes(100)	Bacteroidia(100)	Bacteroidales(100)	Bacteroidaceae(100)	Bacteroides(100)	Bacteroides_massiliensis(99)
Otu581	0	0	0	0.000142784	6.24e-08	6.06e-05	0.0011923	0.0337193	73	Bacteroidetes(100)	Bacteroidia(100)	Bacteroidales(100)	Bacteroidaceae(100)	Bacteroides(100)	Bacteroides_massiliensis(99)
Otu566	0.000170746	7.73e-08	5.25e-05	0	0	0	0.000103297	0.0189408	35	Bacteroidetes(100)	Bacteroidia(100)	Bacteroidales(100)	Bacteroidaceae(100)	Bacteroides(100)	Bacteroides_ovatus(100)
Otu659	0.000569102	1.04e-06	0.000193007	0	0	0	0.000999001	0.0290698	55	Bacteroidetes(100)	Bacteroidia(100)	Bacteroidales(100)	Bacteroidaceae(100)	Bacteroides(100)	Bacteroides_stercoris(100)
Otu682	0.000204448	3.14e-07	0.000105864	0	0	0	0.00149319	0.0412351	19	Bacteroidetes(100)	Bacteroidia(100)	Bacteroidales(100)	Bacteroidaceae(100)	Bacteroides(100)	Bacteroides_stercoris(100)
Otu559	0	0	0	0.000167358	1.96e-07	0.000107467	4.12e-05	0.0103523	181	Bacteroidetes(100)	Bacteroidia(100)	Bacteroidales(100)	Bacteroidaceae(100)	Bacteroides(100)	unclassified
Otu553	0.0249173	0.000730737	0.00510859	3.01e-05	7.38e-09	2.08e-05	0.000999001	0.0290698	3563	Bacteroidetes(100)	Bacteroidia(100)	Bacteroidales(100)	Bacteroidaceae(100)	Bacteroides(100)	unclassified
Otu650	1.09e-05	1.94e-09	8.33e-06	0.000143631	1.2e-07	8.41e-05	0.000439058	0.0290698	20	Bacteroidetes(100)	Bacteroidia(100)	Bacteroidales(100)	Bacteroidaceae(100)	Bacteroides(100)	unclassified
Otu706	0.000210965	3.75e-07	0.000115721	0	0	0	0.00149319	0.0412351	18	Bacteroidetes(100)	Bacteroidia(100)	Bacteroidales(100)	Bacteroidaceae(100)	Bacteroides(100)	unclassified
Otu613	0.000275134	4.23e-07	0.00012298	0	0	0	0.000557842	0.0290698	30	Bacteroidetes(100)	Bacteroidia(100)	Bacteroidales(100)	Bacteroidaceae(100)	Bacteroides(100)	unclassified(90)
Otu644	0	0	0	0.000304993	2.8e-07	0.000128416	4.36e-06	0.00167481	160	Bacteroidetes(100)	Bacteroidia(100)	Bacteroidales(100)	Bacteroidaceae(100)	Bacteroides(100)	unclassified(97)
Otu1640	0	0	0	0.000160958	7.51e-08	6.65e-05	0.000388237	0.0290698	41	Bacteroidetes(100)	Bacteroidia(100)	Bacteroidales(100)	otu_991(100)	unclassified(100)	unclassified(100)
Otu1841	0.000605871	8.7e-07	0.000176291	0	0	0	0.000999001	0.0290698	161	Bacteroidetes(100)	Bacteroidia(100)	Bacteroidales(100)	Porphyromonadaceae(100)	Odoribacter(100)	otu_1020(100)
Otu1813	0.000508795	7.92e-07	0.000168159	0	0	0	0.000999001	0.0290698	54	Bacteroidetes(100)	Bacteroidia(100)	Bacteroidales(100)	Porphyromonadaceae(100)	otu_1014(100)	unclassified(100)
Otu1246	0	0	0	0.000310036	2.54e-07	0.000122323	4.9e-08	8.63e-05	15	Bacteroidetes(100)	Bacteroidia(100)	Bacteroidales(100)	Porphyromonadaceae(100)	Parabacteroides(100)	otu_1022(80)
Otu1247	4.86e-06	6.61e-10	4.86e-06	0.000350389	1.65e-06	0.000311842	0.000291001	0.0290698	14	Bacteroidetes(100)	Bacteroidia(100)	Bacteroidales(100)	Porphyromonadaceae(100)	Parabacteroides(100)	Parabacteroides_distasonis(100)
Otu1243	1.51e-05	6.4e-09	1.51e-05	0.000187153	2.6e-07	0.000123598	0.000103792	0.0189408	27	Bacteroidetes(100)	Bacteroidia(100)	Bacteroidales(100)	Porphyromonadaceae(100)	Parabacteroides(100)	unclassified(97)
Otu1631	0	0	0	0.000154773	1.89e-07	0.000105334	4.12e-05	0.0103523	74	Bacteroidetes(100)	Bacteroidia(100)	Bacteroidales(100)	Prevotellaceae(100)	otu_1033(100)	unclassified(100)
Otu1624	8.86e-06	2.2e-09	8.86e-06	0.00202381	1.38e-05	0.000899671	0.000999001	0.0290698	1379	Bacteroidetes(100)	Bacteroidia(100)	Bacteroidales(100)	Prevotellaceae(100)	otu_1033(100)	unclassified(100)
Otu1644	0	0	0	0.000490769	8.14e-07	0.000218872	0.000999001	0.0290698	29	Bacteroidetes(100)	Bacteroidia(100)	Bacteroidales(100)	Prevotellaceae(100)	otu_1033(100)	unclassified(100)
Otu1633	0	0	0	9.28e-05	4.61e-08	5.21e-05	0.0011923	0.0337193	99	Bacteroidetes(100)	Bacteroidia(100)	Bacteroidales(100)	Prevotellaceae(100)	otu_1033(100)	unclassified(100)
Otu1116	0	0	0	0.000160565	6.2e-08	6.04e-05	0.000126416	0.0189408	24	Bacteroidetes(100)	Bacteroidia(100)	Bacteroidales(100)	Prevotellaceae(100)	Prevotella(100)	otu_1034(100)
Otu1118	0	0	0	0.000141127	7.63e-08	6.7e-05	0.000126416	0.0189408	17	Bacteroidetes(100)	Bacteroidia(100)	Bacteroidales(100)	Prevotellaceae(100)	Prevotella(100)	otu_1034(100)
Otu1050	4.86e-06	6.61e-10	4.86e-06	0.00810835	0.00033051	0.00440928	0.000999001	0.0290698	2093	Bacteroidetes(100)	Bacteroidia(100)	Bacteroidales(100)	Prevotellaceae(100)	Prevotella(100)	otu_1034(100)
Otu1096	1.02e-05	2.93e-09	1.02e-05	0.00708699	0.000118146	0.00263624	0.000999001	0.0290698	1850	Bacteroidetes(100)	Bacteroidia(100)	Bacteroidales(100)	Prevotellaceae(100)	Prevotella(100)	otu_1034(100)
Otu1109	0	0	0	0.000629894	1.3e-06	0.000276997	0.000999001	0.0290698	185	Bacteroidetes(100)	Bacteroidia(100)	Bacteroidales(100)	Prevotellaceae(100)	Prevotella(100)	otu_1034(100)
Otu1114	0	0	0	0.00262935	4.71e-05	0.00166513	0.000999001	0.0290698	251	Bacteroidetes(100)	Bacteroidia(100)	Bacteroidales(100)	Prevotellaceae(100)	Prevotella(100)	otu_1034(100)
Otu1115	0	0	0	0.000488878	1.08e-06	0.000252578	0.000999001	0.0290698	217	Bacteroidetes(100)	Bacteroidia(100)	Bacteroidales(100)	Prevotellaceae(100)	Prevotella(100)	otu_1034(100)
Otu1117	0	0	0	0.000119407	9.53e-08	7.49e-05	0.000388237	0.0290698	51	Bacteroidetes(100)	Bacteroidia(100)	Bacteroidales(100)	Prevotellaceae(100)	Prevotella(100)	otu_1034(100)
Otu1057	9.85e-05	2.41e-08	2.93e-05	0.0788704	0.0202912	0.0345485	0.000999001	0.0290698	57803	Bacteroidetes(100)	Bacteroidia(100)	Bacteroidales(100)	Prevotellaceae(100)	Prevotella(100)	Prevotella_copri(99)
Otu1055	1.89e-05	4.85e-09	1.32e-05	0.000174344	5.17e-07	0.000174344	0.000439058	0.0290698	49	Bacteroidetes(100)	Bacteroidia(100)	Bacteroidales(100)	Prevotellaceae(100)	Prevotella(100)	unclassified
Otu1068	0	0	0	0.000119663	8.22e-08	6.95e-05	0.000388237	0.0290698	136	Bacteroidetes(100)	Bacteroidia(100)	Bacteroidales(100)	Prevotellaceae(100)	Prevotella(100)	unclassified
Otu1078	0	0	0	0.000649561	2.13e-06	0.000353903	0.000999001	0.0290698	96	Bacteroidetes(100)	Bacteroidia(100)	Bacteroidales(100)	Prevotellaceae(100)	Prevotella(100)	unclassified
Otu1108	0	0	0	0.000549839	3.25e-06	0.000437539	0.000999001	0.0290698	41	Bacteroidetes(100)	Bacteroidia(100)	Bacteroidales(100)	Prevotellaceae(100)	Prevotella(100)	unclassified
Otu1113	0	0	0	0.000295608	7.5e-07	0.000210038	4.9e-08	8.63e-05	48	Bacteroidetes(100)	Bacteroidia(100)	Bacteroidales(100)	Prevotellaceae(100)	Prevotella(100)	unclassified(100)
Otu1061	0	0	0	0.00030998	5.43e-07	0.000178648	0.000999001	0.0290698	50	Bacteroidetes(100)	Bacteroidia(100)	Bacteroidales(100)	Prevotellaceae(100)	Prevotella(100)	unclassified(86)
Otu1062	0	0	0	0.000221266	1.44e-07	9.19e-05	1.42e-06	0.000769701	50	Bacteroidetes(100)	Bacteroidia(100)	Bacteroidales(100)	Prevotellaceae(100)	Prevotella(100)	unclassified(96)
Otu1069	0	0	0	0.000771499	4.58e-06	0.000519164	0.000999001	0.0290698	256	Bacteroidetes(100)	Bacteroidia(100)	Bacteroidales(100)	Prevotellaceae(100)	Prevotella(100)	unclassified(97)
Otu1083	0	0	0	0.000746777	2.69e-06	0.000397786	0.000999001	0.0290698	167	Bacteroidetes(100)	Bacteroidia(100)	Bacteroidales(100)	Prevotellaceae(100)	Prevotella(100)	unclassified(99)
Otu1335	0.00181533	7.07e-06	0.000502343	0.0153278	0.000295018	0.00416581	0.000999001	0.0290698	2376	Bacteroidetes(100)	Bacteroidia(100)	Bacteroidales(100)	Rikenellaceae(100)	Alistipes(100)	otu_1053(100)
Otu1337	0.000329288	5.27e-07	0.000137159	0	0	0	0.000999001	0.0290698	871	Bacteroidetes(100)	Bacteroidia(100)	Bacteroidales(100)	Rikenellaceae(100)	Alistipes(100)	otu_1053(100)
Otu1339	0.00155732	1.02e-05	0.000603525	0.00941059	4.4e-05	0.00160912	0.000999001	0.0290698	1373	Bacteroidetes(100)	Bacteroidia(100)	Bacteroidales(100)	Rikenellaceae(100)	Alistipes(100)	otu_1053(100)
Otu1346	0	0	0	0.000479049	6.19e-07	0.000190841	0.000999001	0.0290698	52	Bacteroidetes(100)	Bacteroidia(100)	Bacteroidales(100)	Rikenellaceae(100)	Alistipes(100)	otu_1053(100)
Otu1880	0	0	0	0.000785531	1.32e-06	0.00027895	0.000999001	0.0290698	92	Bacteroidetes(100)	Bacteroidia(100)	Bacteroidales(100)	Rikenellaceae(100)	otu_1052(100)	unclassified(100)
Otu1881	0.000308688	3.09e-07	0.00010499	0	0	0	0.000999001	0.0290698	82	Bacteroidetes(100)	Bacteroidia(100)	Bacteroidales(100)	Rikenellaceae(100)	otu_1052(100)	unclassified(100)
Otu1780	0.000225355	1.42e-06	0.000225355	0	0	0	0.000115021	0.0189408	26	Firmicutes(100)	Bacilli(100)	Lactobacillales(100)	Lactobacillaceae(100)	Lactobacillus(100)	Lactobacillus_zeae(100)
Otu1613	0.000266997	1.73e-07	7.86e-05	0	0	0	0.000115021	0.0189408	48	Firmicutes(100)	Bacilli(100)	Lactobacillales(100)	Streptococcaceae(100)	Streptococcus(100)	Streptococcus_parasanguinis(100)
Otu1606	0.00515787	0.000118536	0.00205753	0.000402652	7.93e-07	0.000215952	0.000999001	0.0290698	1812	Firmicutes(100)	Bacilli(100)	Lactobacillales(100)	Streptococcaceae(100)	Streptococcus(100)	unclassified
Otu1713	2.06e-05	1.19e-08	2.06e-05	0.000270109	1.04e-07	7.81e-05	6.33e-05	0.0139363	34	Firmicutes(100)	Clostridia(100)	Clostridiales(100)	Catabacteriaceae(100)	otu_1998(100)	unclassified(100)
Otu1699	0.00396023	5.6e-05	0.00141402	0	0	0	0.000999001	0.0290698	616	Firmicutes(100)	Clostridia(100)	Clostridiales(100)	Catabacteriaceae(100)	otu_1998(100)	unclassified(100)
Otu1701	1.58e-05	6.98e-09	1.58e-05	0.00117085	4.25e-06	0.00050001	0.000999001	0.0290698	388	Firmicutes(100)	Clostridia(100)	Clostridiales(100)	Catabacteriaceae(100)	otu_1998(100)	unclassified(100)
Otu1705	0.000377741	5.83e-07	0.000144347	0	0	0	0.000999001	0.0290698	55	Firmicutes(100)	Clostridia(100)	Clostridiales(100)	Catabacteriaceae(100)	otu_1998(100)	unclassified(100)
Otu1722	0.000158522	1.56e-07	7.46e-05	1.29e-05	2.84e-09	1.29e-05	0.0016261	0.0445559	100	Firmicutes(100)	Clostridia(100)	Clostridiales(100)	Catabacteriaceae(100)	otu_1998(100)	unclassified(100)
Otu1719	4.61e-05	1.82e-08	2.55e-05	0.000298223	9.2e-08	7.36e-05	0.000124065	0.0189408	26	Firmicutes(100)	Clostridia(100)	Clostridiales(100)	Catabacteriaceae(97)	otu_1998(97)	unclassified(97)
Otu1945	1.92e-05	5.01e-09	1.34e-05	0.000125483	2.68e-07	0.000125483	0.00113344	0.0328462	13	Firmicutes(100)	Clostridia(100)	Clostridiales(100)	Clostridiales_Family_XI._Incertae_Sedis(100)	Finegoldia(100)	unclassified
Otu1932	0	0	0	0.000449742	1.84e-06	0.000329394	0.000999001	0.0290698	31	Firmicutes(100)	Clostridia(100)	Clostridiales(100)	Clostridiales_Family_XI._Incertae_Sedis(100)	Peptoniphilus(100)	Peptoniphilus_asaccharolyticus(100)
Otu1823	4.27e-05	1.79e-08	2.53e-05	0.0017895	1.19e-05	0.000835386	0.000999001	0.0290698	90	Firmicutes(100)	Clostridia(100)	Clostridiales(100)	Clostridiales_Family_XIII._Incertae_Sedis(100)	otu_2066(96)	unclassified(96)
Otu1943	0	0	0	0.000374545	5.45e-07	0.000179081	0.000999001	0.0290698	18	Firmicutes(100)	Clostridia(100)	Clostridiales(100)	Eubacteriaceae(100)	Anaerofustis(100)	Anaerofustis_stercorihominis(100)
Otu1885	0	0	0	0.00407737	8.35e-05	0.00221649	0.000999001	0.0290698	233	Firmicutes(100)	Clostridia(100)	Clostridiales(100)	Eubacteriaceae(100)	Eubacterium(100)	unclassified(100)
Otu550	0.000421071	6.54e-07	0.000152875	0	0	0	0.000999001	0.0290698	135	Firmicutes(100)	Clostridia(100)	Clostridiales(100)	Lachnospiraceae(100)	Blautia(100)	Blautia_producta(100)
Otu491	2.73e-05	1.02e-08	1.91e-05	0.000201891	1.78e-07	0.000102317	0.000221976	0.0289471	81	Firmicutes(100)	Clostridia(100)	Clostridiales(100)	Lachnospiraceae(100)	Blautia(100)	otu_2094(100)
Otu482	0.000341004	2.07e-07	8.6e-05	1.29e-05	2.84e-09	1.29e-05	0.000999001	0.0290698	207	Firmicutes(100)	Clostridia(100)	Clostridiales(100)	Lachnospiraceae(100)	Blautia(100)	otu_2094(100)
Otu489	0.00582476	7.7e-05	0.00165868	0.000367171	5.86e-07	0.000185716	0.000999001	0.0290698	1046	Firmicutes(100)	Clostridia(100)	Clostridiales(100)	Lachnospiraceae(100)	Blautia(100)	otu_2094(100)
Otu495	0.000738958	1.08e-06	0.000196834	0	0	0	0.000999001	0.0290698	104	Firmicutes(100)	Clostridia(100)	Clostridiales(100)	Lachnospiraceae(100)	Blautia(100)	otu_2094(100)
Otu509	0.00130196	4.38e-06	0.000395678	0	0	0	0.000999001	0.0290698	165	Firmicutes(100)	Clostridia(100)	Clostridiales(100)	Lachnospiraceae(100)	Blautia(100)	otu_2094(100)
Otu500	8.86e-06	2.2e-09	8.86e-06	0.000172119	3.34e-07	0.000140085	1.29e-05	0.00429011	25	Firmicutes(100)	Clostridia(100)	Clostridiales(100)	Lachnospiraceae(100)	Blautia(96)	otu_2094(96)
Otu1229	9.72e-06	2.65e-09	9.72e-06	0.000216997	2.54e-07	0.000122315	8.77e-06	0.00308676	203	Firmicutes(100)	Clostridia(100)	Clostridiales(100)	Lachnospiraceae(100)	Clostridium(100)	Clostridium_scindens(100)
Otu1218	0.000236229	1.1e-07	6.26e-05	0	0	0	3.59e-05	0.0103523	90	Firmicutes(100)	Clostridia(100)	Clostridiales(100)	Lachnospiraceae(100)	Clostridium(100)	otu_2101(100)
Otu1222	0.00034607	2.89e-07	0.000101617	1.74e-05	5.17e-09	1.74e-05	0.000999001	0.0290698	91	Firmicutes(100)	Clostridia(100)	Clostridiales(100)	Lachnospiraceae(100)	Clostridium(100)	otu_2101(100)
Otu1226	0.000193645	1.18e-07	6.5e-05	0	0	0	0.000557842	0.0290698	96	Firmicutes(100)	Clostridia(100)	Clostridiales(100)	Lachnospiraceae(100)	Clostridium(97)	otu_2101(97)
Otu956	6.86e-06	1.32e-09	6.86e-06	0.000184514	2.76e-07	0.000127401	4.52e-06	0.00167481	17	Firmicutes(100)	Clostridia(100)	Clostridiales(100)	Lachnospiraceae(100)	Coprococcus(100)	otu_2107(100)
Otu848	2.96e-06	2.45e-10	2.96e-06	0.000176373	2.43e-07	0.000119504	0.000291001	0.0290698	79	Firmicutes(100)	Clostridia(100)	Clostridiales(100)	Lachnospiraceae(100)	Coprococcus(100)	unclassified
Otu831	1.02e-05	2.93e-09	1.02e-05	0.000342805	6.07e-07	0.000188905	1.88e-07	0.000132583	20	Firmicutes(100)	Clostridia(100)	Clostridiales(100)	Lachnospiraceae(100)	Coprococcus(95)	otu_2107(95)
Otu1249	0.0097228	4.86e-05	0.00131703	0.0012388	1.05e-05	0.000784439	0.000999001	0.0290698	4543	Firmicutes(100)	Clostridia(100)	Clostridiales(100)	Lachnospiraceae(100)	Eubacterium(100)	otu_2116(100)
Otu1257	0.000590141	7.66e-07	0.000165388	0	0	0	0.000999001	0.0290698	149	Firmicutes(100)	Clostridia(100)	Clostridiales(100)	Lachnospiraceae(100)	Eubacterium(100)	otu_2116(100)
Otu8	0.000328087	1.9e-07	8.23e-05	0	0	0	0.000999001	0.0290698	165	Firmicutes(100)	Clostridia(100)	Clostridiales(100)	Lachnospiraceae(100)	Incertae_sedis(100)	otu_2088(100)
Otu190	0.000216613	1.25e-07	6.67e-05	0	0	0	0.000103297	0.0189408	33	Firmicutes(100)	Clostridia(100)	Clostridiales(100)	Lachnospiraceae(100)	Incertae_sedis(85)	otu_2088(85)
Otu218	0.000243755	1.09e-07	6.25e-05	0	0	0	0.000999001	0.0290698	53	Firmicutes(100)	Clostridia(100)	Clostridiales(100)	Lachnospiraceae(100)	Incertae_sedis(99)	otu_2088(99)
Otu1273	0.000602344	1.12e-06	0.000199608	0	0	0	0.000999001	0.0290698	274	Firmicutes(100)	Clostridia(100)	Clostridiales(100)	Lachnospiraceae(100)	Lachnospira(99)	otu_2121(99)
Otu62	2.24e-05	6.88e-09	1.57e-05	0.000236884	4.45e-07	0.000161847	6.33e-05	0.0139363	101	Firmicutes(100)	Clostridia(100)	Clostridiales(100)	Lachnospiraceae(100)	otu_2087(100)	unclassified(100)
Otu1	0.00721418	9.57e-05	0.00184902	0.000452265	7.85e-07	0.000214908	0.000999001	0.0290698	1707	Firmicutes(100)	Clostridia(100)	Clostridiales(100)	Lachnospiraceae(100)	otu_2087(100)	unclassified(100)
Otu50	0.00313559	4.36e-05	0.00124813	0	0	0	0.000999001	0.0290698	294	Firmicutes(100)	Clostridia(100)	Clostridiales(100)	Lachnospiraceae(100)	otu_2087(100)	unclassified(100)
Otu96	0.00099437	4.11e-06	0.000382971	0	0	0	0.000999001	0.0290698	115	Firmicutes(100)	Clostridia(100)	Clostridiales(100)	Lachnospiraceae(100)	otu_2087(100)	unclassified(100)
Otu1655	0.00221363	2e-05	0.000844826	0	0	0	0.000999001	0.0290698	208	Firmicutes(100)	Clostridia(100)	Clostridiales(100)	Lachnospiraceae(100)	otu_2087(100)	unclassified(100)
Otu297	6.83e-05	1.08e-07	6.22e-05	0	0	0	0.000305942	0.0290698	35	Firmicutes(100)	Clostridia(100)	Clostridiales(100)	Lachnospiraceae(100)	otu_2087(80)	unclassified(80)
Otu1506	0	0	0	0.000344184	2.28e-07	0.000115757	0.000999001	0.0290698	114	Firmicutes(100)	Clostridia(100)	Clostridiales(100)	Lachnospiraceae(100)	otu_2087(98)	unclassified(98)
Otu24	0.000761609	7.05e-07	0.000158708	2.11e-05	7.58e-09	2.11e-05	0.000999001	0.0290698	284	Firmicutes(100)	Clostridia(100)	Clostridiales(100)	Lachnospiraceae(100)	otu_2087(99)	unclassified(99)
Otu815	0	0	0	0.000254242	1.1e-06	0.000254242	0.000999001	0.0290698	19	Firmicutes(100)	Clostridia(100)	Clostridiales(100)	Lachnospiraceae(100)	Roseburia(100)	otu_2130(100)
Otu725	0.000278016	1.72e-07	7.84e-05	0	0	0	0.000115021	0.0189408	37	Firmicutes(100)	Clostridia(100)	Clostridiales(100)	Lachnospiraceae(100)	Roseburia(100)	Roseburia_faecis(100)
Otu719	0.031038	0.000929493	0.00576161	0.000703666	7.42e-07	0.000208851	0.000999001	0.0290698	14295	Firmicutes(100)	Clostridia(100)	Clostridiales(100)	Lachnospiraceae(100)	Roseburia(100)	Roseburia_faecis(85)
Otu772	0.000186583	1.09e-07	6.24e-05	0	0	0	0.000305942	0.0290698	65	Firmicutes(100)	Clostridia(100)	Clostridiales(100)	Lachnospiraceae(100)	Roseburia(100)	unclassified
Otu786	0.00193177	1.1e-05	0.000627743	0	0	0	0.000999001	0.0290698	193	Firmicutes(100)	Clostridia(100)	Clostridiales(100)	Lachnospiraceae(100)	Roseburia(100)	unclassified
Otu787	0.000222658	1.58e-07	7.5e-05	0	0	0	0.000305942	0.0290698	29	Firmicutes(100)	Clostridia(100)	Clostridiales(100)	Lachnospiraceae(100)	Roseburia(80)	unclassified
Otu752	0.000434245	8.09e-07	0.000169947	0	0	0	0.000999001	0.0290698	70	Firmicutes(100)	Clostridia(100)	Clostridiales(100)	Lachnospiraceae(100)	Roseburia(96)	unclassified
Otu720	0.0500981	0.00303248	0.0104069	0.0125691	0.000481583	0.00532245	0.000999001	0.0290698	21210	Firmicutes(100)	Clostridia(100)	Clostridiales(100)	Lachnospiraceae(100)	Roseburia(99)	Eubacterium_rectale(98)
Otu989	0.00629178	1.36e-05	0.000696109	0.00155476	1.28e-05	0.000868445	0.000999001	0.0290698	3897	Firmicutes(100)	Clostridia(100)	Clostridiales(100)	Lachnospiraceae(100)	Ruminococcus(100)	otu_2133(100)
Otu976	0.0018769	8.18e-06	0.000540601	0	0	0	0.000999001	0.0290698	949	Firmicutes(100)	Clostridia(100)	Clostridiales(100)	Lachnospiraceae(100)	Ruminococcus(100)	unclassified(93)
Otu48	0	0	0	0.00673139	0.000148032	0.00295089	0.000999001	0.0290698	415	Firmicutes(100)	Clostridia(100)	Clostridiales(100)	Lachnospiraceae(100)	Ruminococcus(89)	otu_2133(89)
Otu40	0.000357443	5.22e-07	0.000136497	0	0	0	0.000999001	0.0290698	41	Firmicutes(100)	Clostridia(100)	Clostridiales(100)	Lachnospiraceae(100)	unclassified	unclassified
Otu968	0.00561275	4.64e-05	0.00128672	0.000368557	3.89e-07	0.000151252	0.000999001	0.0290698	2647	Firmicutes(100)	Clostridia(100)	Clostridiales(100)	Lachnospiraceae(100)	unclassified	unclassified
Otu1034	0.000293395	3.49e-07	0.000111583	0	0	0	0.000999001	0.0290698	39	Firmicutes(100)	Clostridia(100)	Clostridiales(100)	Lachnospiraceae(100)	unclassified	unclassified
Otu1270	0.000435005	3.73e-07	0.000115364	1.31e-05	2.92e-09	1.31e-05	0.000999001	0.0290698	72	Firmicutes(100)	Clostridia(100)	Clostridiales(100)	Lachnospiraceae(100)	unclassified	unclassified
Otu325	0	0	0	0.000504424	1.88e-06	0.000332282	4.9e-08	8.63e-05	15	Firmicutes(100)	Clostridia(100)	Clostridiales(100)	Lachnospiraceae(100)	unclassified(100)	unclassified(100)
Otu326	0	0	0	0.000308394	1.22e-06	0.000267444	4.12e-05	0.0103523	10	Firmicutes(100)	Clostridia(100)	Clostridiales(100)	Lachnospiraceae(100)	unclassified(100)	unclassified(100)
Otu246	4.36e-05	2.97e-08	3.26e-05	0.000226333	1.62e-07	9.75e-05	0.000221976	0.0289471	17	Firmicutes(100)	Clostridia(100)	Clostridiales(100)	Lachnospiraceae(100)	unclassified(100)	unclassified(100)
Otu21	0	0	0	0.000101682	4.15e-08	4.94e-05	0.000388237	0.0290698	13	Firmicutes(100)	Clostridia(100)	Clostridiales(100)	Lachnospiraceae(100)	unclassified(100)	unclassified(100)
Otu23	0.00038477	1.72e-07	7.85e-05	0	0	0	0.000999001	0.0290698	197	Firmicutes(100)	Clostridia(100)	Clostridiales(100)	Lachnospiraceae(100)	unclassified(100)	unclassified(100)
Otu32	0.000580564	1.71e-06	0.000247363	0.00456104	2.2e-05	0.00113658	0.000999001	0.0290698	861	Firmicutes(100)	Clostridia(100)	Clostridiales(100)	Lachnospiraceae(100)	unclassified(100)	unclassified(100)
Otu34	0.00282519	6.96e-06	0.000498435	0.000186945	1.44e-07	9.2e-05	0.000999001	0.0290698	1738	Firmicutes(100)	Clostridia(100)	Clostridiales(100)	Lachnospiraceae(100)	unclassified(100)	unclassified(100)
Otu36	0.000275717	3.11e-07	0.000105367	0	0	0	0.000999001	0.0290698	92	Firmicutes(100)	Clostridia(100)	Clostridiales(100)	Lachnospiraceae(100)	unclassified(100)	unclassified(100)
Otu39	0.00328158	5.84e-06	0.000456525	0.00014669	1.89e-07	0.000105462	0.000999001	0.0290698	1191	Firmicutes(100)	Clostridia(100)	Clostridiales(100)	Lachnospiraceae(100)	unclassified(100)	unclassified(100)
Otu101	0.000774962	9.12e-07	0.000180466	0	0	0	0.000999001	0.0290698	325	Firmicutes(100)	Clostridia(100)	Clostridiales(100)	Lachnospiraceae(100)	unclassified(100)	unclassified(100)
Otu185	0.000345142	3.3e-07	0.000108538	0	0	0	0.000999001	0.0290698	44	Firmicutes(100)	Clostridia(100)	Clostridiales(100)	Lachnospiraceae(100)	unclassified(100)	unclassified(100)
Otu227	0	0	0	0.00046834	3.73e-06	0.00046834	0.000999001	0.0290698	46	Firmicutes(100)	Clostridia(100)	Clostridiales(100)	Lachnospiraceae(100)	unclassified(100)	unclassified(100)
Otu850	0.000179182	1.13e-07	6.35e-05	0	0	0	0.000557842	0.0290698	36	Firmicutes(100)	Clostridia(100)	Clostridiales(100)	Lachnospiraceae(100)	unclassified(100)	unclassified(100)
Otu1268	0	0	0	0.000156773	1.4e-07	9.07e-05	0.0011923	0.0337193	13	Firmicutes(100)	Clostridia(100)	Clostridiales(100)	Lachnospiraceae(100)	unclassified(100)	unclassified(100)
Otu255	6.32e-05	6.82e-08	4.94e-05	0	0	0	0.00149319	0.0412351	97	Firmicutes(100)	Clostridia(100)	Clostridiales(100)	Lachnospiraceae(100)	unclassified(100)	unclassified(100)
Otu261	0	0	0	0.00022929	5.36e-07	0.000177569	0.000999001	0.0290698	350	Firmicutes(100)	Clostridia(100)	Clostridiales(100)	Lachnospiraceae(100)	unclassified(82)	unclassified(82)
Otu869	0	0	0	0.000823217	4.11e-06	0.00049196	0.000999001	0.0290698	827	Firmicutes(100)	Clostridia(100)	Clostridiales(100)	Lachnospiraceae(100)	unclassified(84)	unclassified(84)
Otu845	0.000289795	4.39e-07	0.000125218	0	0	0	0.000174353	0.0236112	44	Firmicutes(100)	Clostridia(100)	Clostridiales(100)	Lachnospiraceae(100)	unclassified(87)	unclassified(87)
Otu25	0.00168899	3.86e-06	0.000371153	1.29e-05	2.84e-09	1.29e-05	0.000999001	0.0290698	295	Firmicutes(100)	Clostridia(100)	Clostridiales(100)	Lachnospiraceae(100)	unclassified(90)	unclassified(90)
Otu241	0	0	0	0.000199221	2.36e-07	0.000117782	0.000388237	0.0290698	20	Firmicutes(100)	Clostridia(100)	Clostridiales(100)	Lachnospiraceae(100)	unclassified(95)	unclassified(95)
Otu95	0.000457572	4.91e-07	0.000132447	0	0	0	0.000999001	0.0290698	232	Firmicutes(100)	Clostridia(100)	Clostridiales(100)	Lachnospiraceae(100)	unclassified(99)	unclassified(99)
Otu1489	0	0	0	0.000329614	3.02e-07	0.000133211	1.51e-07	0.000117862	17	Firmicutes(100)	Clostridia(100)	Clostridiales(100)	otu_1995(100)	unclassified(100)	unclassified(100)
Otu1569	0	0	0	0.000205998	2.39e-07	0.00011862	1.51e-07	0.000117862	14	Firmicutes(100)	Clostridia(100)	Clostridiales(100)	otu_1995(100)	unclassified(100)	unclassified(100)
Otu1739	0	0	0	0.00030808	5.37e-07	0.000177746	1.51e-07	0.000117862	30	Firmicutes(100)	Clostridia(100)	Clostridiales(100)	otu_1995(100)	unclassified(100)	unclassified(100)
Otu1766	0	0	0	0.000239026	4.18e-07	0.000156736	1.51e-07	0.000117862	14	Firmicutes(100)	Clostridia(100)	Clostridiales(100)	otu_1995(100)	unclassified(100)	unclassified(100)
Otu1558	0.000267817	2.84e-07	0.000100721	0	0	0	0.000174353	0.0236112	23	Firmicutes(100)	Clostridia(100)	Clostridiales(100)	otu_1995(100)	unclassified(100)	unclassified(100)
Otu1171	1.05e-05	3.11e-09	1.05e-05	0.000738531	1.58e-06	0.00030518	0.000999001	0.0290698	45	Firmicutes(100)	Clostridia(100)	Clostridiales(100)	otu_1995(100)	unclassified(100)	unclassified(100)
Otu1483	0.00466218	2.6e-05	0.000962878	0.00010892	7.27e-08	6.54e-05	0.000999001	0.0290698	1583	Firmicutes(100)	Clostridia(100)	Clostridiales(100)	otu_1995(100)	unclassified(100)	unclassified(100)
Otu1523	0.0191933	0.00134591	0.00693312	0	0	0	0.000999001	0.0290698	2677	Firmicutes(100)	Clostridia(100)	Clostridiales(100)	otu_1995(100)	unclassified(100)	unclassified(100)
Otu1532	0.00024812	2.58e-07	9.61e-05	0	0	0	0.000305942	0.0290698	29	Firmicutes(100)	Clostridia(100)	Clostridiales(100)	otu_1995(100)	unclassified(100)	unclassified(100)
Otu1538	0.000195764	2.17e-07	8.81e-05	0	0	0	0.000502095	0.0290698	29	Firmicutes(100)	Clostridia(100)	Clostridiales(100)	otu_1995(100)	unclassified(100)	unclassified(100)
Otu1567	0.000535575	1.05e-06	0.000193957	0	0	0	0.000999001	0.0290698	51	Firmicutes(100)	Clostridia(100)	Clostridiales(100)	otu_1995(100)	unclassified(100)	unclassified(100)
Otu1568	0.000240671	3.75e-07	0.000115789	0	0	0	0.000502095	0.0290698	20	Firmicutes(100)	Clostridia(100)	Clostridiales(100)	otu_1995(100)	unclassified(100)	unclassified(100)
Otu1755	0.000236533	2.77e-07	9.95e-05	0	0	0	0.000305942	0.0290698	28	Firmicutes(100)	Clostridia(100)	Clostridiales(100)	otu_1995(100)	unclassified(100)	unclassified(100)
Otu1763	0.000345608	5.41e-07	0.000138979	0	0	0	0.000999001	0.0290698	34	Firmicutes(100)	Clostridia(100)	Clostridiales(100)	otu_1995(100)	unclassified(100)	unclassified(100)
Otu1671	0.000193673	2.93e-07	0.000102381	0	0	0	0.00149319	0.0412351	23	Firmicutes(100)	Clostridia(100)	Clostridiales(100)	otu_1995(100)	unclassified(100)	unclassified(100)
Otu1181	6.1e-06	1.04e-09	6.1e-06	0.000219566	1.59e-07	9.68e-05	1.57e-06	0.000791158	26	Firmicutes(100)	Clostridia(100)	Clostridiales(100)	otu_1995(93)	unclassified(93)	unclassified(93)
Otu1775	0.000248757	9.87e-08	5.94e-05	0	0	0	0.000174353	0.0236112	27	Firmicutes(100)	Clostridia(100)	Clostridiales(100)	Ruminococcaceae(100)	Eubacterium(100)	Eubacterium_siraeum(100)
Otu1771	0.00774844	0.000133311	0.002182	0.000496979	1.79e-06	0.000324185	0.000999001	0.0290698	898	Firmicutes(100)	Clostridia(100)	Clostridiales(100)	Ruminococcaceae(100)	Eubacterium(100)	Eubacterium_siraeum(99)
Otu1770	0.000324114	6.13e-07	0.000147936	0	0	0	0.000999001	0.0290698	126	Firmicutes(100)	Clostridia(100)	Clostridiales(100)	Ruminococcaceae(100)	Eubacterium(100)	otu_2172(100)
Otu392	0.000414677	8.44e-07	0.000173645	0	0	0	0.000999001	0.0290698	277	Firmicutes(100)	Clostridia(100)	Clostridiales(100)	Ruminococcaceae(100)	Faecalibacterium(100)	otu_2174(100)
Otu410	0.000235882	1.71e-07	7.81e-05	0	0	0	0.000557842	0.0290698	56	Firmicutes(100)	Clostridia(100)	Clostridiales(100)	Ruminococcaceae(100)	Faecalibacterium(100)	otu_2174(100)
Otu376	0.000281584	2.05e-07	8.56e-05	0	0	0	0.000999001	0.0290698	104	Firmicutes(100)	Clostridia(100)	Clostridiales(100)	Ruminococcaceae(100)	Faecalibacterium(100)	otu_2174(82)
Otu367	0.00142415	2.21e-06	0.000281075	2.58e-05	1.13e-08	2.58e-05	0.000999001	0.0290698	530	Firmicutes(100)	Clostridia(100)	Clostridiales(100)	Ruminococcaceae(100)	Faecalibacterium(100)	otu_2174(84)
Otu381	0.000243561	3.69e-07	0.000114861	0	0	0	6.3e-05	0.0139363	44	Firmicutes(100)	Clostridia(100)	Clostridiales(100)	Ruminococcaceae(100)	Faecalibacterium(100)	otu_2174(89)
Otu387	0.000220246	1.4e-07	7.07e-05	0	0	0	0.000849479	0.0290698	44	Firmicutes(100)	Clostridia(100)	Clostridiales(100)	Ruminococcaceae(100)	Faecalibacterium(100)	otu_2174(91)
Otu423	0.000273927	1.57e-07	7.5e-05	0	0	0	0.000174353	0.0236112	84	Firmicutes(100)	Clostridia(100)	Clostridiales(100)	Ruminococcaceae(100)	Faecalibacterium(100)	otu_2174(93)
Otu368	0.0353759	0.000672382	0.00490037	0.00101218	3.45e-06	0.000450339	0.000999001	0.0290698	14871	Firmicutes(100)	Clostridia(100)	Clostridiales(100)	Ruminococcaceae(100)	Faecalibacterium(100)	otu_2174(99)
Otu364	0.066647	0.0031202	0.0105563	0.00484746	0.000126951	0.00273271	0.000999001	0.0290698	24687	Firmicutes(100)	Clostridia(100)	Clostridiales(100)	Ruminococcaceae(100)	Faecalibacterium(100)	unclassified
Otu365	0.0278527	0.00030312	0.00329025	0.00356426	2.38e-05	0.00118357	0.000999001	0.0290698	7681	Firmicutes(100)	Clostridia(100)	Clostridiales(100)	Ruminococcaceae(100)	Faecalibacterium(100)	unclassified
Otu373	0.000660061	3.67e-07	0.000114505	0	0	0	0.000999001	0.0290698	159	Firmicutes(100)	Clostridia(100)	Clostridiales(100)	Ruminococcaceae(100)	Faecalibacterium(100)	unclassified
Otu375	0.00106077	1.35e-06	0.000219484	6.67e-05	1.65e-08	3.11e-05	0.000999001	0.0290698	501	Firmicutes(100)	Clostridia(100)	Clostridiales(100)	Ruminococcaceae(100)	Faecalibacterium(100)	unclassified
Otu393	0.000288628	1.32e-07	6.86e-05	0	0	0	0.000999001	0.0290698	77	Firmicutes(100)	Clostridia(100)	Clostridiales(100)	Ruminococcaceae(100)	Faecalibacterium(100)	unclassified
Otu405	0.000822253	6.76e-07	0.000155398	0	0	0	0.000999001	0.0290698	273	Firmicutes(100)	Clostridia(100)	Clostridiales(100)	Ruminococcaceae(100)	Faecalibacterium(100)	unclassified
Otu382	0.000212951	4.56e-08	4.04e-05	0	0	0	6.3e-05	0.0139363	65	Firmicutes(100)	Clostridia(100)	Clostridiales(100)	Ruminococcaceae(100)	Faecalibacterium(94)	unclassified
Otu369	0.00159136	3.58e-06	0.000357736	3.04e-05	7.55e-09	2.11e-05	0.000999001	0.0290698	267	Firmicutes(100)	Clostridia(100)	Clostridiales(100)	Ruminococcaceae(100)	Faecalibacterium(99)	otu_2174(95)
Otu1366	0.000235972	2.66e-07	9.75e-05	0	0	0	0.000115021	0.0189408	71	Firmicutes(100)	Clostridia(100)	Clostridiales(100)	Ruminococcaceae(100)	Oscillospira(100)	otu_2176(100)
Otu1360	0.00036989	2.77e-07	9.94e-05	0	0	0	0.000999001	0.0290698	251	Firmicutes(100)	Clostridia(100)	Clostridiales(100)	Ruminococcaceae(100)	Oscillospira(100)	otu_2176(100)
Otu1362	0.000579539	5.9e-07	0.000145204	3.46e-05	2.04e-08	3.46e-05	0.000999001	0.0290698	115	Firmicutes(100)	Clostridia(100)	Clostridiales(100)	Ruminococcaceae(100)	Oscillospira(100)	otu_2176(100)
Otu1363	0.00590181	0.000214767	0.00276952	0	0	0	0.000999001	0.0290698	2835	Firmicutes(100)	Clostridia(100)	Clostridiales(100)	Ruminococcaceae(100)	Oscillospira(100)	otu_2176(100)
Otu1420	1.73e-05	4.4e-09	1.25e-05	0.000355443	2.53e-07	0.000121879	3.22e-06	0.00151264	24	Firmicutes(100)	Clostridia(100)	Clostridiales(100)	Ruminococcaceae(100)	otu_2159(100)	unclassified(100)
Otu1158	0	0	0	0.000130516	8.88e-08	7.23e-05	0.000126416	0.0189408	13	Firmicutes(100)	Clostridia(100)	Clostridiales(100)	Ruminococcaceae(100)	otu_2159(100)	unclassified(100)
Otu1423	0.000227363	1.67e-07	7.73e-05	0	0	0	0.000115021	0.0189408	42	Firmicutes(100)	Clostridia(100)	Clostridiales(100)	Ruminococcaceae(100)	otu_2159(100)	unclassified(100)
Otu1391	0	0	0	0.000957899	2.68e-06	0.000396683	0.000999001	0.0290698	155	Firmicutes(100)	Clostridia(100)	Clostridiales(100)	Ruminococcaceae(100)	otu_2159(100)	unclassified(100)
Otu1394	0	0	0	0.00076486	1.2e-06	0.000266052	0.000999001	0.0290698	100	Firmicutes(100)	Clostridia(100)	Clostridiales(100)	Ruminococcaceae(100)	otu_2159(100)	unclassified(100)
Otu1399	0	0	0	0.000519605	7.37e-07	0.000208239	0.000999001	0.0290698	151	Firmicutes(100)	Clostridia(100)	Clostridiales(100)	Ruminococcaceae(100)	otu_2159(100)	unclassified(100)
Otu1401	0.000782068	5.87e-07	0.000144784	1.75e-05	5.19e-09	1.75e-05	0.000999001	0.0290698	279	Firmicutes(100)	Clostridia(100)	Clostridiales(100)	Ruminococcaceae(100)	otu_2159(100)	unclassified(100)
Otu1412	0.00042337	1.43e-07	7.15e-05	0.00500452	5.61e-05	0.00181704	0.000999001	0.0290698	387	Firmicutes(100)	Clostridia(100)	Clostridiales(100)	Ruminococcaceae(100)	otu_2159(100)	unclassified(100)
Otu1425	4.86e-06	6.61e-10	4.86e-06	0.00230668	7.57e-06	0.000667236	0.000999001	0.0290698	173	Firmicutes(100)	Clostridia(100)	Clostridiales(100)	Ruminococcaceae(100)	otu_2159(100)	unclassified(100)
Otu1429	0.00103165	1.76e-06	0.000250573	1.71e-05	4.94e-09	1.71e-05	0.000999001	0.0290698	322	Firmicutes(100)	Clostridia(100)	Clostridiales(100)	Ruminococcaceae(100)	otu_2159(100)	unclassified(100)
Otu1430	0.000510819	2.84e-07	0.000100722	1.31e-05	2.92e-09	1.31e-05	0.000999001	0.0290698	104	Firmicutes(100)	Clostridia(100)	Clostridiales(100)	Ruminococcaceae(100)	otu_2159(100)	unclassified(100)
Otu1431	0.0016013	6.76e-06	0.000491236	0	0	0	0.000999001	0.0290698	419	Firmicutes(100)	Clostridia(100)	Clostridiales(100)	Ruminococcaceae(100)	otu_2159(100)	unclassified(100)
Otu1436	0.000473638	2.33e-06	0.00028864	0	0	0	0.000999001	0.0290698	52	Firmicutes(100)	Clostridia(100)	Clostridiales(100)	Ruminococcaceae(100)	otu_2159(100)	unclassified(100)
Otu1467	0.000506844	5.7e-07	0.000142702	0	0	0	0.000999001	0.0290698	46	Firmicutes(100)	Clostridia(100)	Clostridiales(100)	Ruminococcaceae(100)	otu_2159(100)	unclassified(100)
Otu1647	0.00161195	6.79e-06	0.000492392	0	0	0	0.000999001	0.0290698	580	Firmicutes(100)	Clostridia(100)	Clostridiales(100)	Ruminococcaceae(100)	otu_2159(100)	unclassified(100)
Otu1167	4.28e-05	1.19e-08	2.06e-05	0.000297833	5.27e-07	0.000176124	0.000288868	0.0290698	26	Firmicutes(100)	Clostridia(100)	Clostridiales(100)	Ruminococcaceae(100)	otu_2159(97)	unclassified(97)
Otu1328	6.1e-06	1.04e-09	6.1e-06	0.000245916	2.92e-07	0.000131069	4.52e-06	0.00167481	15	Firmicutes(100)	Clostridia(100)	Clostridiales(100)	Ruminococcaceae(100)	Ruminococcus(100)	otu_2178(100)
Otu1282	0.00101434	2.42e-06	0.000294126	0	0	0	0.000999001	0.0290698	247	Firmicutes(100)	Clostridia(100)	Clostridiales(100)	Ruminococcaceae(100)	Ruminococcus(100)	otu_2178(100)
Otu1284	0.000393756	2.42e-07	9.29e-05	0	0	0	0.000999001	0.0290698	619	Firmicutes(100)	Clostridia(100)	Clostridiales(100)	Ruminococcaceae(100)	Ruminococcus(100)	otu_2178(100)
Otu1287	0.000443684	4.86e-07	0.000131684	0	0	0	0.000999001	0.0290698	141	Firmicutes(100)	Clostridia(100)	Clostridiales(100)	Ruminococcaceae(100)	Ruminococcus(100)	otu_2178(100)
Otu1291	0.000355944	3.16e-07	0.000106158	0	0	0	0.000999001	0.0290698	177	Firmicutes(100)	Clostridia(100)	Clostridiales(100)	Ruminococcaceae(100)	Ruminococcus(100)	otu_2178(100)
Otu1294	0.0451405	0.00927225	0.0181976	3.41e-05	1.98e-08	3.41e-05	0.000999001	0.0290698	8374	Firmicutes(100)	Clostridia(100)	Clostridiales(100)	Ruminococcaceae(100)	Ruminococcus(100)	otu_2178(100)
Otu1295	0.000413329	6.69e-07	0.000154549	0	0	0	0.000999001	0.0290698	105	Firmicutes(100)	Clostridia(100)	Clostridiales(100)	Ruminococcaceae(100)	Ruminococcus(100)	otu_2178(100)
Otu1296	0.000345912	2.34e-07	9.15e-05	0	0	0	0.000999001	0.0290698	87	Firmicutes(100)	Clostridia(100)	Clostridiales(100)	Ruminococcaceae(100)	Ruminococcus(100)	otu_2178(100)
Otu1317	0.000203155	1.74e-07	7.87e-05	0	0	0	0.000502095	0.0290698	64	Firmicutes(100)	Clostridia(100)	Clostridiales(100)	Ruminococcaceae(100)	Ruminococcus(100)	otu_2178(100)
Otu1333	3.75e-05	8.92e-09	1.78e-05	0.000183245	1.79e-07	0.000102612	0.000623193	0.0290698	16	Firmicutes(100)	Clostridia(100)	Clostridiales(100)	Ruminococcaceae(100)	Ruminococcus(100)	otu_2178(100)
Otu1329	0.00018507	1.84e-07	8.11e-05	0	0	0	0.00149319	0.0412351	18	Firmicutes(100)	Clostridia(100)	Clostridiales(100)	Ruminococcaceae(100)	Ruminococcus(100)	Ruminococcus_bromii(100)
Otu1332	0	0	0	0.000476848	4.98e-07	0.000171185	0.000999001	0.0290698	21	Firmicutes(100)	Clostridia(100)	Clostridiales(100)	Ruminococcaceae(100)	unclassified(100)	unclassified(100)
Otu1140	0.00868273	0.000160371	0.00239323	0.000116405	4.59e-08	5.2e-05	0.000999001	0.0290698	1989	Firmicutes(100)	Clostridia(100)	Clostridiales(100)	Ruminococcaceae(100)	unclassified(85)	unclassified(85)
Otu1789	4.33e-05	1.25e-08	2.11e-05	0.000195402	3.03e-07	0.000133457	0.00145418	0.0409611	40	Firmicutes(100)	Clostridia(100)	Clostridiales(100)	Ruminococcaceae(100)	unclassified(90)	unclassified(90)
Otu1480	0	0	0	0.00039325	1.42e-06	0.000288581	0.000999001	0.0290698	17	Firmicutes(100)	Clostridia(100)	Clostridiales(100)	Ruminococcaceae(100)	unclassified(95)	unclassified(95)
Otu1130	0.000250968	1.63e-07	7.62e-05	0	0	0	0.000115021	0.0189408	72	Firmicutes(100)	Clostridia(100)	Clostridiales(100)	Ruminococcaceae(100)	unclassified(96)	unclassified(96)
Otu1131	0.000474516	1.06e-06	0.000194674	0	0	0	0.000999001	0.0290698	69	Firmicutes(100)	Clostridia(100)	Clostridiales(100)	Ruminococcaceae(100)	unclassified(96)	unclassified(96)
Otu1125	0.00165664	3.97e-06	0.000376461	9.65e-05	3.64e-08	4.63e-05	0.000999001	0.0290698	457	Firmicutes(100)	Clostridia(100)	Clostridiales(100)	Ruminococcaceae(100)	unclassified(97)	unclassified(97)
Otu1787	0	0	0	0.00159926	6.12e-06	0.00059992	0.000999001	0.0290698	130	Firmicutes(100)	Clostridia(100)	Clostridiales(100)	Ruminococcaceae(100)	unclassified(97)	unclassified(97)
Otu1124	0.00037114	4.09e-07	0.000120849	0	0	0	0.000999001	0.0290698	53	Firmicutes(100)	Clostridia(100)	Clostridiales(100)	Ruminococcaceae(100)	unclassified(99)	unclassified(99)
Otu1524	0.000243276	1.9e-07	8.25e-05	0	0	0	0.000305942	0.0290698	29	Firmicutes(100)	Clostridia(100)	Clostridiales(100)	unclassified(100)	unclassified(100)	unclassified(100)
Otu1547	0	0	0	0.000282204	5.59e-07	0.00018138	0.000999001	0.0290698	18	Firmicutes(100)	Clostridia(100)	Clostridiales(100)	unclassified(100)	unclassified(100)	unclassified(100)
Otu1649	0.000153943	8.07e-08	5.37e-05	0	0	0	0.000849479	0.0290698	35	Firmicutes(100)	Clostridia(100)	Clostridiales(100)	unclassified(100)	unclassified(100)	unclassified(100)
Otu1669	0	0	0	0.00133596	1.14e-05	0.000817264	0.000999001	0.0290698	42	Firmicutes(100)	Clostridia(100)	Clostridiales(100)	unclassified(100)	unclassified(100)	unclassified(100)
Otu1676	0	0	0	0.00211993	1.52e-05	0.000945566	0.000999001	0.0290698	121	Firmicutes(100)	Clostridia(100)	Clostridiales(100)	unclassified(100)	unclassified(100)	unclassified(100)
Otu1678	1.89e-05	4.84e-09	1.31e-05	0.000169237	1.24e-07	8.54e-05	0.000439058	0.0290698	14	Firmicutes(100)	Clostridia(100)	Clostridiales(100)	unclassified(100)	unclassified(100)	unclassified(100)
Otu1684	0	0	0	0.00203909	1.25e-05	0.000856461	0.000999001	0.0290698	102	Firmicutes(100)	Clostridia(100)	Clostridiales(100)	unclassified(100)	unclassified(100)	unclassified(100)
Otu1824	0.00021192	1.27e-07	6.75e-05	0.00301325	1.81e-05	0.00103161	0.000999001	0.0290698	354	Firmicutes(100)	Clostridia(100)	Clostridiales(100)	unclassified(100)	unclassified(100)	unclassified(100)
Otu1667	0.000259563	2.6e-07	9.64e-05	0	0	0	0.000999001	0.0290698	54	Firmicutes(100)	Clostridia(100)	Clostridiales(100)	unclassified(97)	unclassified(97)	unclassified(97)
Otu1577	0.000923816	4.3e-06	0.00039181	0.0361337	0.00321739	0.0137571	0.000999001	0.0290698	7232	Firmicutes(100)	Clostridia(100)	Clostridiales(100)	Veillonellaceae(100)	Dialister(100)	Dialister_invisus(100)
Otu1584	0.00171969	7.87e-06	0.000530047	0	0	0	0.000999001	0.0290698	147	Firmicutes(100)	Clostridia(100)	Clostridiales(100)	Veillonellaceae(100)	Dialister(100)	otu_2210(100)
Otu1541	0.000903674	5.09e-06	0.000426521	0	0	0	0.000999001	0.0290698	72	Proteobacteria(100)	Alphaproteobacteria(100)	otu_2451(100)	unclassified(100)	unclassified(100)	unclassified(100)
Otu1891	0.0111689	0.000672389	0.0049004	0	0	0	0.000999001	0.0290698	911	Proteobacteria(100)	Alphaproteobacteria(100)	otu_2451(100)	unclassified(100)	unclassified(100)	unclassified(100)
Otu1853	0.00190984	4.02e-06	0.000378978	0.000166384	1.31e-07	8.77e-05	0.000999001	0.0290698	818	Proteobacteria(100)	Betaproteobacteria(100)	Burkholderiales(100)	Alcaligenaceae(100)	otu_2934(100)	unclassified(100)
Otu1849	0	0	0	0.000194648	1.68e-07	9.95e-05	0.000388237	0.0290698	607	Proteobacteria(100)	Betaproteobacteria(100)	Burkholderiales(100)	Alcaligenaceae(100)	Sutterella(100)	otu_2953(100)
Otu1955	0	0	0	0.000103335	1.82e-07	0.000103335	0.000126416	0.0189408	11	Proteobacteria(100)	Betaproteobacteria(100)	Burkholderiales(100)	Burkholderiaceae(100)	Ralstonia(100)	otu_3005(100)
Otu1953	0	0	0	0.000152967	1.5e-07	9.4e-05	0.0011923	0.0337193	11	Proteobacteria(100)	Betaproteobacteria(100)	Burkholderiales(100)	Comamonadaceae(100)	Delftia(100)	otu_3030(100)
Otu1928	0	0	0	0.000129169	2.84e-07	0.000129169	1.34e-05	0.00429011	10	Proteobacteria(100)	Betaproteobacteria(100)	Burkholderiales(100)	Oxalobacteraceae(100)	otu_3061(100)	unclassified(100)
Otu1877	0	0	0	0.00116328	4.87e-06	0.00053512	0.000999001	0.0290698	70	Proteobacteria(100)	Betaproteobacteria(100)	Burkholderiales(100)	unclassified(100)	unclassified(100)	unclassified(100)
Otu1886	0.000417523	5.99e-07	0.000146208	0	0	0	0.000999001	0.0290698	119	Proteobacteria(100)	Gammaproteobacteria(100)	Pasteurellales(100)	Pasteurellaceae(100)	Haemophilus(100)	Haemophilus_parainfluenzae(100)
Otu1944	2.13e-05	6.15e-09	1.48e-05	0.000170928	4e-07	0.000153356	0.000439058	0.0290698	19	Tenericutes(100)	Erysipelotrichi(100)	Erysipelotrichales(100)	Erysipelotrichaceae(100)	Bulleidia(100)	Solobacterium_moorei(100)
Otu1619	1.93e-05	1.05e-08	1.93e-05	0.00881883	0.00064177	0.0061442	0.000999001	0.0290698	1728	Tenericutes(100)	Erysipelotrichi(100)	Erysipelotrichales(100)	Erysipelotrichaceae(100)	Catenibacterium(100)	otu_4201(83)
Otu1591	1.1e-05	1.99e-09	8.44e-06	0.000456045	3e-07	0.000132854	0.000999001	0.0290698	1038	Tenericutes(100)	Erysipelotrichi(100)	Erysipelotrichales(100)	Erysipelotrichaceae(100)	Clostridium(100)	Clostridium_ramosum(100)
Otu1593	0.0158849	0.000250651	0.00299196	0.000609846	1.01e-06	0.000243593	0.000999001	0.0290698	8054	Tenericutes(100)	Erysipelotrichi(100)	Erysipelotrichales(100)	Erysipelotrichaceae(100)	Clostridium(100)	otu_4203(100)
Otu1600	0	0	0	0.0009214	1.91e-06	0.000335473	0.000999001	0.0290698	51	Tenericutes(100)	Erysipelotrichi(100)	Erysipelotrichales(100)	Erysipelotrichaceae(100)	Clostridium(100)	otu_4203(100)
Otu1602	0.000480572	8.57e-07	0.000174902	0	0	0	0.000999001	0.0290698	44	Tenericutes(100)	Erysipelotrichi(100)	Erysipelotrichales(100)	Erysipelotrichaceae(100)	Clostridium(100)	otu_4203(100)
Otu1603	0.000432438	7.5e-07	0.000163661	0	0	0	0.000999001	0.0290698	39	Tenericutes(100)	Erysipelotrichi(100)	Erysipelotrichales(100)	Erysipelotrichaceae(100)	Clostridium(100)	otu_4203(100)
Otu1902	2.44e-05	1.67e-08	2.44e-05	0.000170126	3.7e-07	0.000147545	0.000623193	0.0290698	49	Tenericutes(100)	Erysipelotrichi(100)	Erysipelotrichales(100)	Erysipelotrichaceae(100)	Coprobacillus(100)	Coprobacillus_cateniformis(100)
Otu1897	0	0	0	0.00045132	4.82e-07	0.000168409	0.000999001	0.0290698	63	Tenericutes(100)	Erysipelotrichi(100)	Erysipelotrichales(100)	Erysipelotrichaceae(100)	Holdemania(100)	otu_4211(100)
Otu1925	0	0	0	0.000281047	2.03e-07	0.000109315	1.51e-07	0.000117862	39	Tenericutes(100)	Erysipelotrichi(100)	Erysipelotrichales(100)	Erysipelotrichaceae(100)	Incertae_sedis(100)	Clostridium_innocuum(100)
Otu1695	0	0	0	0.000232779	6.61e-07	0.000197129	4.12e-05	0.0103523	58	Tenericutes(100)	Erysipelotrichi(100)	Erysipelotrichales(100)	Erysipelotrichaceae(100)	Incertae_sedis(100)	Eubacterium_biforme(100)
Otu1696	0	0	0	0.000119436	9.49e-08	7.47e-05	4.12e-05	0.0103523	19	Tenericutes(100)	Erysipelotrichi(100)	Erysipelotrichales(100)	Erysipelotrichaceae(100)	Incertae_sedis(100)	Eubacterium_biforme(100)
Otu1694	0	0	0	0.000107049	1.95e-07	0.000107049	0.000126416	0.0189408	35	Tenericutes(100)	Erysipelotrichi(100)	Erysipelotrichales(100)	Erysipelotrichaceae(100)	Incertae_sedis(100)	Eubacterium_biforme(100)
Otu1689	2.44e-05	8.13e-09	1.7e-05	0.0268646	0.00271734	0.0126429	0.000999001	0.0290698	6229	Tenericutes(100)	Erysipelotrichi(100)	Erysipelotrichales(100)	Erysipelotrichaceae(100)	Incertae_sedis(100)	Eubacterium_biforme(100)
Otu1698	0	0	0	0.00137712	5.16e-06	0.000551138	0.000999001	0.0290698	74	Tenericutes(100)	Erysipelotrichi(100)	Erysipelotrichales(100)	Erysipelotrichaceae(100)	Incertae_sedis(100)	Eubacterium_biforme(100)
Otu1692	0	0	0	0.00011559	3.55e-08	4.57e-05	0.0011923	0.0337193	10	Tenericutes(100)	Erysipelotrichi(100)	Erysipelotrichales(100)	Erysipelotrichaceae(100)	Incertae_sedis(100)	Eubacterium_biforme(100)
Otu1570	0	0	0	0.000855997	1.7e-06	0.000316408	0.000999001	0.0290698	40	Tenericutes(100)	Erysipelotrichi(100)	Erysipelotrichales(100)	Erysipelotrichaceae(100)	Incertae_sedis(100)	unclassified(100)
Otu1906	0.000318836	3.81e-07	0.000116656	0	0	0	0.000999001	0.0290698	41	Tenericutes(100)	Mollicutes(100)	RF39(100)	otu_4318(100)	unclassified(100)	unclassified(100)
Otu1910	0.000137263	3.09e-07	0.000105115	0	0	0	0.000557842	0.0290698	21	Tenericutes(100)	Mollicutes(100)	RF39(100)	otu_4318(100)	unclassified(100)	unclassified(100)
